# Supplementary material for: Cardiac arrest in the paediatric intensive care unit: defining the problem and developing solutions
Source: HighWire-hosted journal article supplement (doi:10.1136/bmjoq-2020-000930), 2020-12-01
Supplement: bmjoq-2020-000930supp005_data_supplement.pdf [file bmjoq-2020-000930supp005_data_supplement.pdf]

## PICU Code Review – RT Review

Was respiratory support escalated previously, or leading up to arrest? If so, what and why.

Did you have specific concerns about the patient before the arrest? If so, do you feel your concerns were heard / addressed?

What do you feel went well with the code?

Were there any equipment issues? (Cart stocked appropriately, laryngoscope light works, etc)

Who got RT equipment and how did it go?

Was there a supervisor on staff? Team Leader? Were they available? If so what was role.

Any RT around to cover the unit?

Were code roles well defined?

Was there effective / closed loop communication?

If you face this same situation again, what would you do differently?

Any other constructive thoughts?
